# Supplementary material for: Cu-based quaternary chalcogenide Cu2BaSnS4 thin films acting as hole transport layers in inverted perovskite CH3NH3PbI3 solar cells
Source: Royal Society of Chemistry journal article supplement (doi:10.1039/c6ta08426e), 2016-11-30
Supplement: c6ta08426e1.pdf [file c6ta08426e1.pdf]

**Cu-based quaternary chalcogenide  $\text{Cu}_2\text{BaSnS}_4$  thin films acting as hole-transport layers in inverted perovskite  $\text{CH}_3\text{NH}_3\text{PbI}_3$  solar cells**

*Jie Ge, Corey R. Grice, and Yanfa Yan*

Department of Physics and Astronomy & Wright Center for Photovoltaics Innovation and Commercialization, the University of Toledo, Toledo, Ohio 43606, United States

## Experimental Section

### Materials synthesis and device fabrication:

**Cu<sub>2</sub>BaSnS<sub>4</sub> (CBTS):** CBTS precursor films were deposited on commercial fluorine-doped SnO<sub>2</sub> (FTO) glass (TEC 15, NSG) substrates by co-sputtering Cu, SnS and BaS targets (3 in., Plasma Materials Co.) using the LAB Line SPUTTER 5 system (Kurt J Lesker Co.). The substrate temperature was kept at 150 °C during the co-sputtering. The Cu poor composition of film precursors was controlled by varying the radio-frequency powers for each target, Cu: 45W; SnS: 45 W; BaS: 110 W. The co-sputtered precursor films were then annealed in sulfur vapor at 540 °C for 30 min to yield the CBTS with the desirable *p*-type conductivity. The film thickness was adjusted by varying the cosputtering deposition time: 100 nm for 5 min; 150 nm for 8 min; 500 nm for 30 min. The sulfurized CBTS films were dipped in a 1 M KCN aqueous solution for 30 s, followed by deionized water and methanol rinsing for 2 min and drying with nitrogen.

**CH<sub>3</sub>NH<sub>3</sub>PbI<sub>3</sub> (MaPbI<sub>3</sub>):** The perovskite precursors were prepared by spin-coating the precursor solution consisting of 461 mg of PbI<sub>2</sub> and 159 mg of CH<sub>3</sub>NH<sub>3</sub>I dissolved in 723  $\mu$ L of N,N-dimethylformamide and 81  $\mu$ L of dimethyl sulfoxide. The molar ratio between PbI<sub>2</sub> and CH<sub>3</sub>NH<sub>3</sub>I is 1:1. All the perovskite precursors were annealed at 60 °C for 2 min and then 120 °C for 15 min in a glovebox.

**Phenyl-C<sub>61</sub>-butyric acid methyl ester (PCBM):** PCBM films were spin-coated using 10 mg mL<sup>-1</sup> PCBM dichlorobenzene solutions with a spin rate of 2000 rpm for 30 s and then annealed on a hotplate at 100 °C for 10 min in a glove box.

**2,20,7,70-tetrakis-(N,N-di-pmethoxyphenylamine) 9,90-spirobifluorene (Spiro):** The Spiro solution consisted of 26 mM Li-bis(trifluoromethanesulfonyl) imide (LiTFSI) (Sigma, 99.95%), 55 mM 4-tert-butylpyridine (TBP), and 68 mM Spiro, which were dissolved in a mixed solvent of acetonitrile and chlorobenzene with a volume ratio of 1:10. The Spiro solution was spin-coated on the perovskite films at 500 rpm for 1 s and subsequently 2000 rpm for 60 s in a dry box.

**Poly (3,4-ethylenedioxythiophene): poly(styrene sulfonate) (PEDOT:PSS):** PEDOT:PSS (Baytron 4083) was then spin-cast onto clean FTO substrates, followed by annealing at 150 °C for 10 min in air.

**TiO<sub>2</sub>:** a compact TiO<sub>2</sub> blocking layer was spin-coated with 0.3 M titanium diisopropoxide bis(acetylacetonate) in 1-butanol solution by the spin-coating method, which was heated at 200 °C for 15 min. On the prepared compact TiO<sub>2</sub> blocking layer, the nanocrystalline TiO<sub>2</sub> paste (Dyesol) diluted with ethanol was spin-coated and the deposited film was annealed at 550 °C for 1 h to produce mesoporous TiO<sub>2</sub> thin layer.

**Metal electrode:** 60 nm thick Au and Ag electrodes were thermally evaporated on top of Spiro and PCBM, respectively. The total area of the solar cells was 0.08 cm<sup>2</sup>.

### Film characterization:

X-ray diffraction (XRD) data were collected using a Rigaku Ultima III diffractometer with Cu K $\alpha$  lines (0.15418 nm) in Bragg-Brentano Theta-2Theta scans, with the Cu source

operated at 40 kV and 44 mA electron excitation current. Theta calibration was done using a standard Si sample prior to the measurements. The phase identification and the refinement of lattice constants were done using the software of MDI Jade 2010 equipped with a monthly synchronized ICDD database (International Centre for Diffraction Data). Confocal Raman spectroscopy was carried out using a 632.8 nm laser (HORIBA Scientific), with the Raman shift calibrated by a Si sample at 520.4 cm<sup>-1</sup>. The optical transmittance of a CBTS thin film deposited on a FTO substrate was measured by an ultraviolet–visible spectrophotometer (PerkinElmer Lambda 1050). The composition of our CBTS thin films were characterized by energy dispersive X-ray spectroscopy (EDS) equipped in a field–emission scanning electron microscope (FE–SEM) (Hitachi S4800 FE–SEM).

To determine the band positions of CBTS, we performed the dark capacitance-voltage (C-V) measurement in a neutral electrolyte (pH=6.4) containing sodium sulfite (0.5 M) and potassium phosphate (0.5 M) based on 3-electrode configuration, where FTO/CBTS serves as the working electrode, a Ag/AgCl (1 M KCl) electrode serves as the reference electrode, and a Pt wire serves as the counter electrode. A photoelectrochemistry workstation equipped with a frequency analyzer (ModuLab, Solartron Analytical) was used for this measurement. Potentials versus the Ag/AgCl (1 M KCl) electrode ( $E_{\text{Ag/AgCl}}$ ) were converted to potential versus reversible hydrogen electrode (RHE,  $V_{\text{RHE}}$ ) using the Nernst equation, namely,  $V_{\text{RHE}} = V_{\text{Ag/AgCl}} + 0.059 \times \text{pH} + 0.222$ .

### Device Testing:

The  $J$ – $V$  curves of the perovskite solar devices measured under a simulated AM1.5G irradiation with a standard solar simulator (PV Measurements Inc.). The EQE data were measured using a commercial EQE system (PV Measurements Inc.). EQE derived photocurrent/short circuit current densities ( $J$ ) can be integrated from the expression

$$J = \frac{e}{hc} \int \lambda (\text{EQE} * \text{AM1.5G}) d\lambda$$

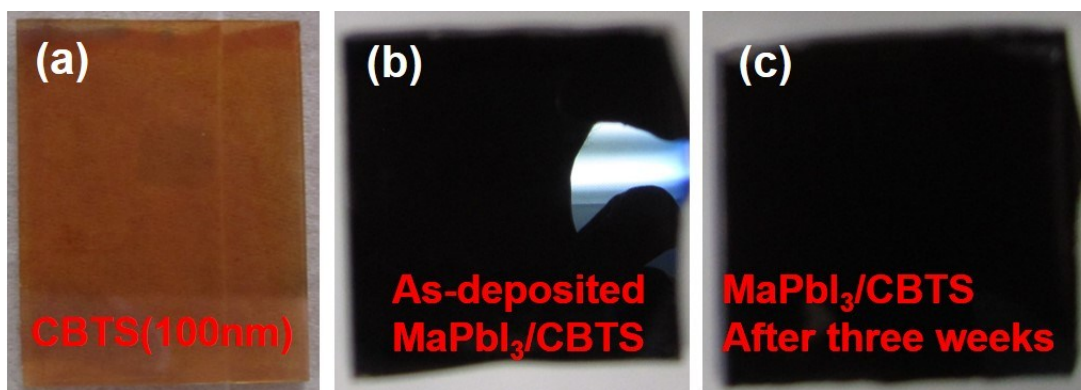

**Figure S1** Digital photos of a 100 nm thick CBTS film (a), a just-made MaPbI<sub>3</sub> film on CBTS (b), and a MaPbI<sub>3</sub>/CBTS sample which was stored in a N<sub>2</sub> filled desiccator for three weeks.

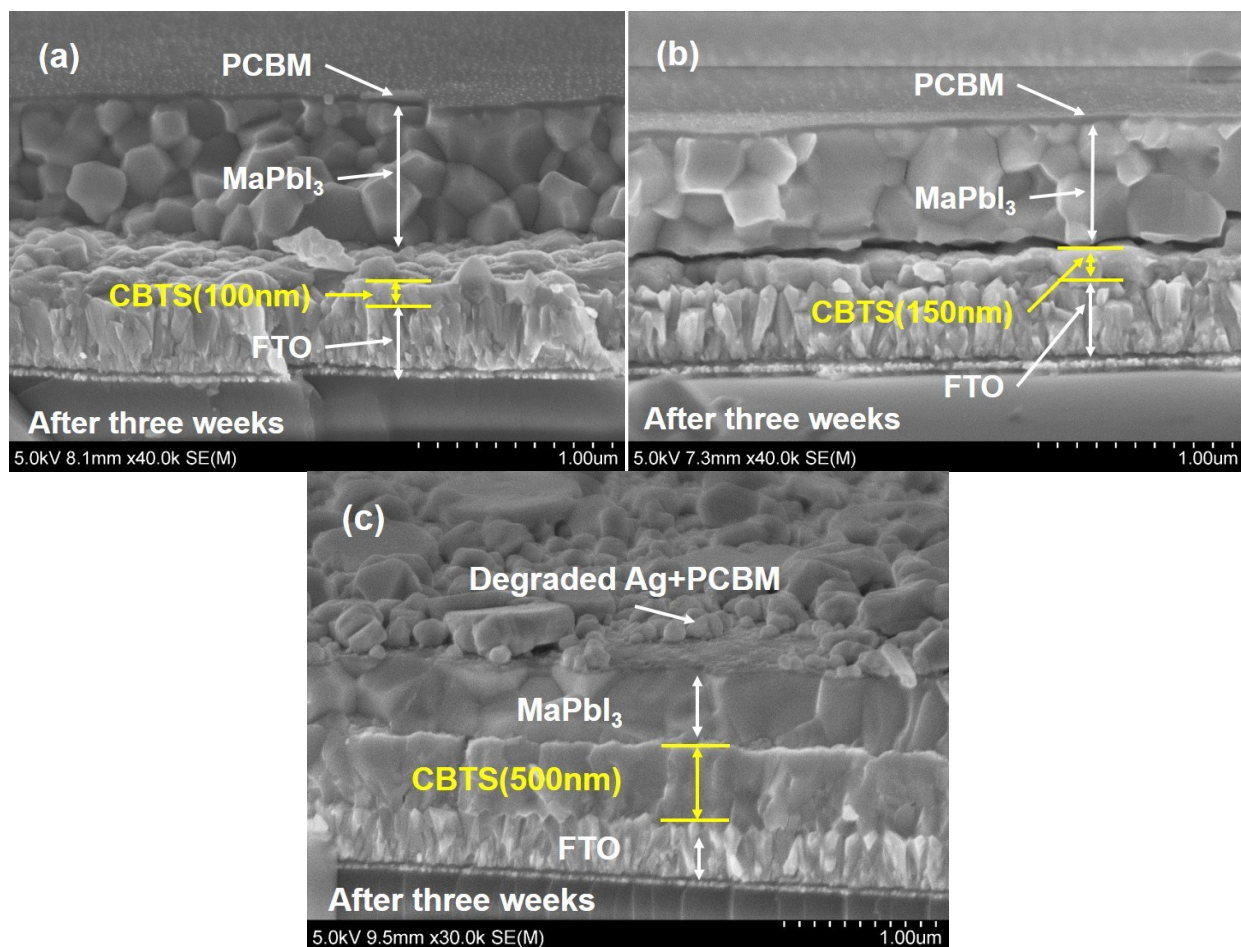

**Figure S2** Cross-sectional SEM images of inverted MaPbI<sub>3</sub> solar cells based on 100 nm (a), 150 nm (b), and 500 nm (c) thick CBTS HTLs. Solar cells were stored in N<sub>2</sub> filled desiccator for three weeks.

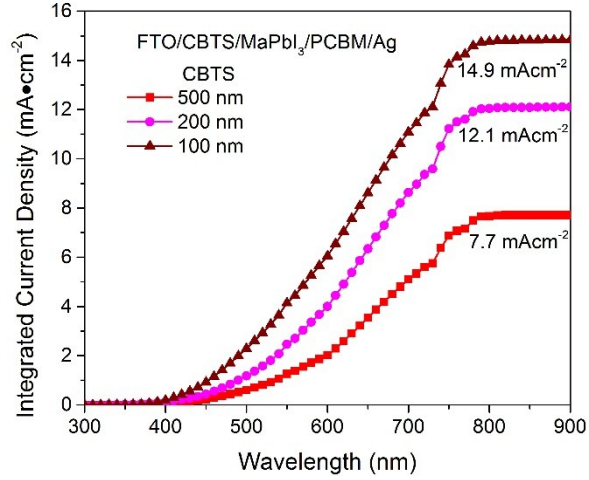

**Figure S3** Integrated current densities from the EQE data of CBTS based inverted MaPbI<sub>3</sub> solar cells in Figure 5b.

**Table S1** Device parameters under reverse ( $V_{OC} \rightarrow J_{SC}$ ) and forward ( $J_{SC} \rightarrow V_{OC}$ ) voltage scans of our best perovskite MaPbI<sub>3</sub> solar cells with various device structures.<sup>a</sup>

| Device Structure                              | Scan                        | PCE (%) | $V_{OC}$ (V) | FF (%) | $J_{SC}$ (mA cm <sup>-2</sup> ) |
|-----------------------------------------------|-----------------------------|---------|--------------|--------|---------------------------------|
| FTO/PEDOT:PSS/<br>MaPbI <sub>3</sub> /PCBM/Ag | $V_{OC} \rightarrow J_{SC}$ | 8.5     | 0.927        | 66.69  | 13.75                           |
|                                               | $J_{SC} \rightarrow V_{OC}$ | 8.1     | 0.924        | 65.52  | 13.38                           |
| FTO/MaPbI <sub>3</sub> /<br>PCBM/Ag           | $V_{OC} \rightarrow J_{SC}$ | 3.5     | 0.684        | 50.05  | 10.15                           |
|                                               | $J_{SC} \rightarrow V_{OC}$ | 2.5     | 0.673        | 45.85  | 8.22                            |
| FTO/TiO <sub>2</sub> /MaPbI <sub>3</sub>      | $V_{OC} \rightarrow J_{SC}$ | 14.2    | 1.04         | 74.12  | 18.42                           |
| /Spiro/Au                                     | $J_{SC} \rightarrow V_{OC}$ | 13.5    | 1.04         | 68.51  | 18.80                           |

<sup>a</sup> These device parameters come from the light J-V curves given in Figure S3a.

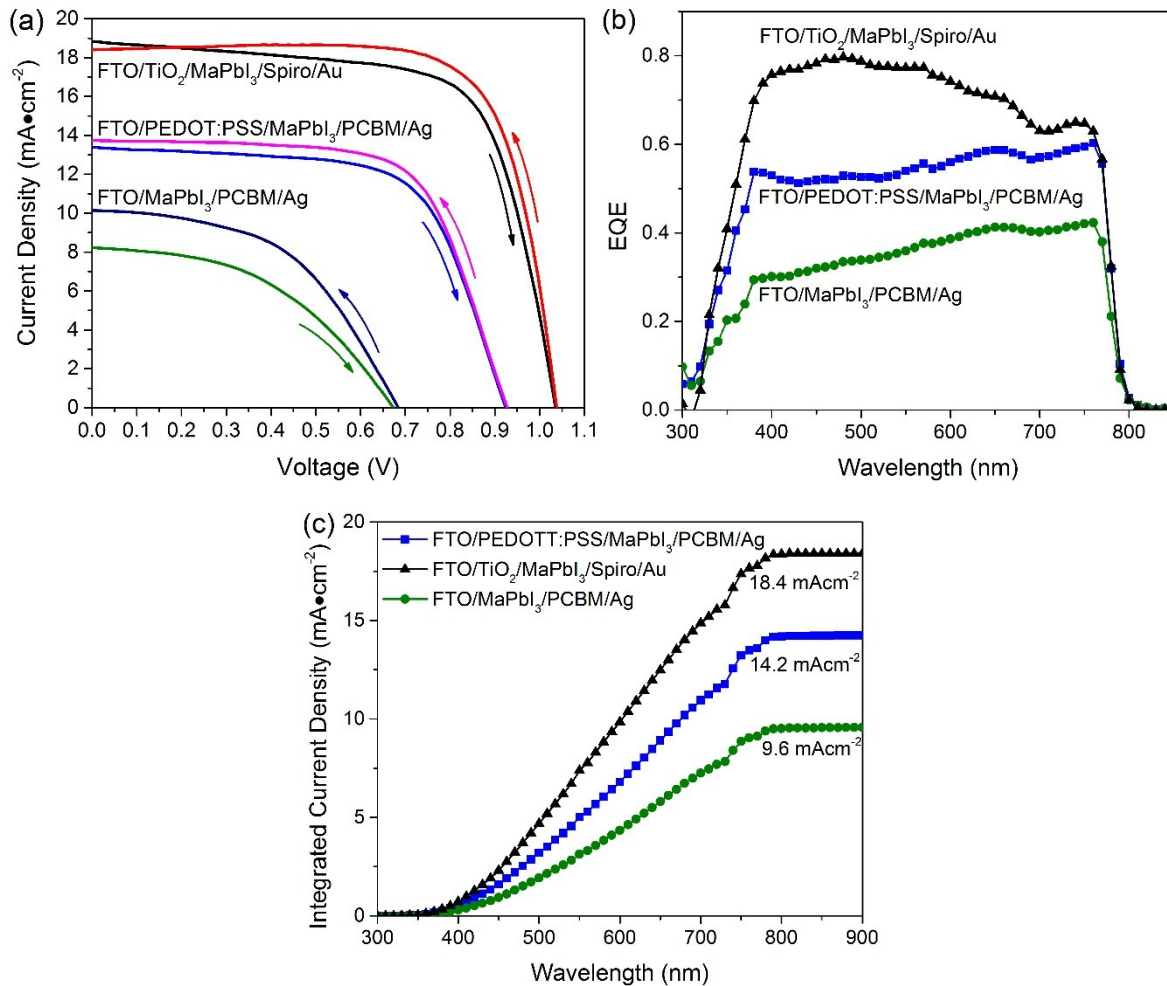

**Figure S4** AM 1.5G illuminated J-V characteristics under reverse ( $V_{OC} \rightarrow J_{SC}$ ) and forward ( $J_{SC} \rightarrow V_{OC}$ ) voltage scans (a), corresponding EQE curves (b) and EQE integrated current densities (c) of our best MaPbI<sub>3</sub> solar cells with various device structures: FTO/PEDOT:PSS/MaPbI<sub>3</sub>/PCBM/Ag, FTO/MaPbI<sub>3</sub>/PCBM/Ag, and FTO/TiO<sub>2</sub>/MaPbI<sub>3</sub>/Spiro/Ag. Note: these devices were measured immediately as obtained under the ambient air condition (relative humidity: 70%).

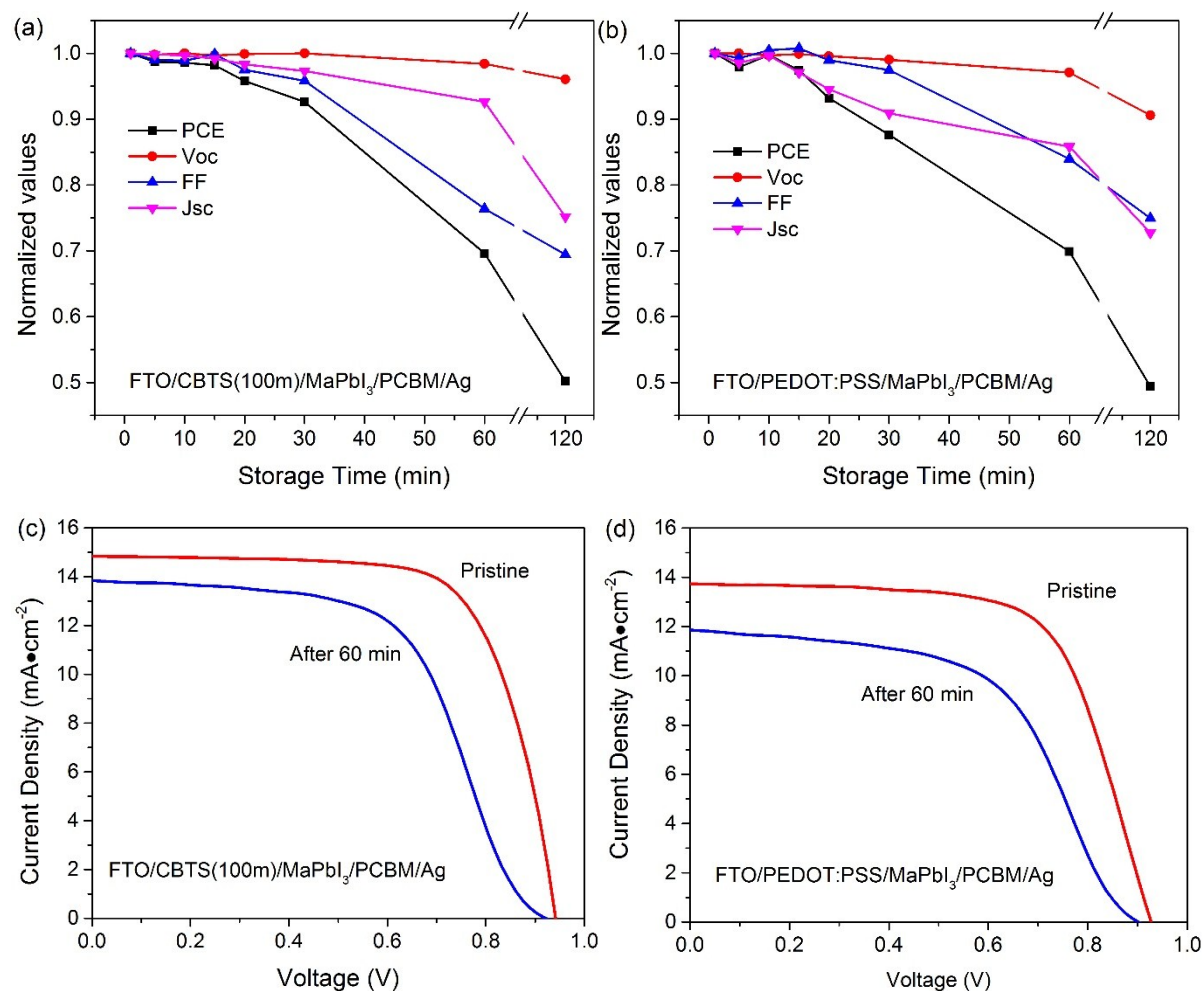

**Figure S5** Device stability tests in the air for our best inverted  $\text{MaPbI}_3$  solar cells based on a 100 nm CBTS (a) HTL and a PEDOTT:PSS HTL (b); light J-V curves of these two inverted  $\text{MaPbI}_3$  solar cells based on CBTS (c) and PEDOTT:PSS (d), respectively. Note: device stability tests were measured under the ambient air condition (relative humidity: 70%).
